# Supplementary material for: Mature Biofilm Degradation by Potential Probiotics: Aggregatibacter actinomycetemcomitans versus Lactobacillus spp
Source: PubMed Central journal article supplement (PMC4954673; doi:10.1371/journal.pone.0159466), 2016-07-20
Supplement: pone.0159466.s003.pdf [file pone.0159466.s003.pdf]

| Biofilm formation by A.a strains with and without probiotic cell additions |                     |        |        |        |        | Paired T-test           |        |    |                          |
|----------------------------------------------------------------------------|---------------------|--------|--------|--------|--------|-------------------------|--------|----|--------------------------|
|                                                                            | A.a Y4 (serotype b) |        |        |        |        | Comparison with Control |        |    |                          |
|                                                                            | n1                  | n2     | n3     | Ave    | SD     | P values                | t      | df | Standard error different |
| L. acidophilus JCM 1021                                                    | 0.0472              | 0.0514 | 0.0419 | 0.0468 | 0.0047 | 0.0159                  | 7.8289 | 2  | 0.0550                   |
| L. casei subsp. rhamnosus NBRC 3831                                        | 0.0306              | 0.0532 | 0.0512 | 0.0450 | 0.0125 | 0.0188                  | 7.1808 | 2  | 0.0600                   |
| L. delbrueckii subsp. casei JCM 1012                                       | 0.0317              | 0.0388 | 0.0397 | 0.0367 | 0.0044 | 0.0174                  | 7.4886 | 2  | 0.059                    |
| L. fermentum JCM 1137                                                      | 0.0360              | 0.0297 | 0.0308 | 0.0322 | 0.0033 | 0.0161                  | 7.785  | 2  | 0.0570                   |
| L. lactis NBRC 12007                                                       | 0.1179              | 0.1153 | 0.1509 | 0.1280 | 0.0198 | 0.0369                  | 5.0623 | 2  | 0.0690                   |
| L. fermentum NBRC 15885                                                    | 0.0387              | 0.0347 | 0.0353 | 0.0362 | 0.0022 | 0.0150                  | 7.6991 | 2  | 0.0570                   |
| L. casei NBRC 15883                                                        | 0.0511              | 0.0466 | 0.0456 | 0.0478 | 0.0030 | 0.0170                  | 7.575  | 2  | 0.0570                   |
| L. fructosum NBRC 3516                                                     | 0.0409              | 0.0487 | 0.0498 | 0.0464 | 0.0049 | 0.0182                  | 7.3023 | 2  | 0.0590                   |
| L. plantarum NBRC 15891                                                    | 0.1839              | 0.2138 | 0.1591 | 0.1856 | 0.0274 | 0.0219                  | 6.6493 | 2  | 0.0440                   |
| Leuconostoc mesenteroides IAM 1046                                         | 0.0698              | 0.0651 | 0.0591 | 0.0647 | 0.0053 | 0.0192                  | 7.1121 | 2  | 0.0580                   |
| L. johnsonii NBRC 13952                                                    | 0.0427              | 0.0467 | 0.0495 | 0.0463 | 0.0034 | 0.0274                  | 5.9213 | 2  | 0.0690                   |
| L. sake NBRC 3541                                                          | 0.0479              | 0.0609 | 0.0908 | 0.0665 | 0.0220 | 0.0274                  | 5.9123 | 2  | 0.0690                   |
| L. paracasei subsp. paracasei NBRC 3533                                    | 0.0666              | 0.0830 | 0.0839 | 0.0778 | 0.0097 | 0.0220                  | 6.6347 | 2  | 0.0600                   |
| A. actinomycetemcomitans Y4                                                | 0.5198              | 0.5461 | 0.3622 | 0.4760 | 0.0994 |                         |        |    |                          |
| A. naeslundii JCM 8349                                                     | 0.6360              | 0.5880 | 0.5300 | 0.5847 | 0.0531 | 0.0970                  | 2.9729 | 2  | 0.0370                   |

|                                     | A.a SUNY 75 (serotype a) |        |        |        |        |        | Paired T-test-Comparison with control |         |        |    |                              |
|-------------------------------------|--------------------------|--------|--------|--------|--------|--------|---------------------------------------|---------|--------|----|------------------------------|
|                                     | n1                       | n2     | n3     | n4     | n5     | Ave    | SD                                    | P-value | t      | df | Standard error of difference |
| L. fermentum JCM 1137               | 0.1220                   | 0.1310 | 0.1300 | 0.1200 | 0.0521 | 0.1110 | 0.0333                                | 0.0030  | 6.4541 | 4  | 0.0350                       |
| L. acidophilus JCM 1021             | 0.1550                   | 0.1580 | 0.1460 | 0.1510 | 0.1790 | 0.1578 | 0.0127                                | 0.0076  | 4.9867 | 4  | 0.0360                       |
| L. fermentum NBRC 15885             | 0.1280                   | 0.1120 | 0.0970 | 0.1050 | 0.1010 | 0.1086 | 0.0122                                | 0.0042  | 5.8733 | 4  | 0.0390                       |
| L. fructosum NBRC 3516              | 0.0830                   | 0.1230 | 0.0920 | 0.0910 | 0.1810 | 0.1140 | 0.0404                                | 0.0092  | 4.7134 | 4  | 0.0047                       |
| L. plantarum NBRC 15891             | 0.2710                   | 0.2510 | 0.2340 | 0.2160 | 0.2170 | 0.2378 | 0.0234                                | 0.0720  | 2.4401 | 4  | 0.0410                       |
| L. casei subsp. rhamnosus NBRC 3831 | 0.4200                   | 0.4300 | 0.4380 | 0.4430 | 0.4700 | 0.4402 | 0.0188                                | 0.0347  | 3.1459 | 4  | 0.0330                       |
| L. johnsonii NBRC 13952             | 0.1314                   | 0.1196 | 0.1202 | 0.1297 | 0.1318 | 0.1265 | 0.0061                                | 0.0043  | 5.8445 | 4  | 0.0360                       |
| A.a SUNY 75 (serotype a)            | 0.2210                   | 0.3580 | 0.4330 | 0.3470 | 0.3290 | 0.3398 | 0.0851                                |         |        |    |                              |
| A. naeslundii JCM 8349              | 0.4550                   | 0.4480 | 0.3120 | 0.3370 |        | 0.3880 | 0.0741                                | 0.5679  | 0.6396 | 3  | 0.0750                       |
|                                     |                          |        |        |        |        |        |                                       |         |        |    |                              |

|  | OMZ 534 (Serotype e) |  | Paired-t test |
|--|----------------------|--|---------------|
|--|----------------------|--|---------------|

|                                                   | n1     | n2     | n3     | n4     | n5     | Ave    | SD     | P-value | t       | df | standard error of difference |
|---------------------------------------------------|--------|--------|--------|--------|--------|--------|--------|---------|---------|----|------------------------------|
| <i>L. fermentum</i> JCM 1137                      | 0.0055 | 0.0108 | 0.0135 | 0.0158 | 0.0088 | 0.0109 | 0.0040 | 0.0007  | 9.4075  | 4  | 0.0450                       |
| <i>L. acidophilus</i> JCM 1021                    | 0.1741 | 0.2569 | 0.1846 | 0.2261 | 0.2282 | 0.2140 | 0.0341 | 0.0104  | 4.5489  | 4  | 0.0490                       |
| <i>L. fermentum</i> NBRC 15885                    | 0.0006 | 0.0019 | 0.0031 | 0.0013 | 0.0024 | 0.0019 | 0.0010 | 0.0007  | 9.5125  | 4  | 0.0460                       |
| <i>L. fructosum</i> NBRC 3516                     | 0.0043 | 0.0059 | 0.0163 | 0.0127 | 0.0196 | 0.0118 | 0.0066 | 0.0006  | 9.6948  | 4  | 0.0440                       |
| <i>L. plantarum</i> NBRC 15891                    | 0.2483 | 0.2424 | 0.1980 | 0.2386 | 0.2020 | 0.2259 | 0.0239 | 0.0135  | 4.2152  | 4  | 0.0500                       |
| <i>L. casei</i> subsp. <i>rhamnosus</i> NBRC 3831 | 0.3153 | 0.3716 | 0.3450 | 0.3539 | 0.2703 | 0.3312 | 0.0397 | 0.1400  | 1.8375  | 4  | 0.0570                       |
| <i>L. johnsonii</i> NBRC 13952                    | 0.0180 | 0.0318 | 0.0214 | 0.0369 | 0.0216 | 0.0260 | 0.0080 | 0.0008  | 9.0436  | 4  | 0.0450                       |
| <i>A.a</i> OMZ534(serotype e)                     | 0.4029 | 0.3009 | 0.4019 | 0.5437 | 0.5343 | 0.4367 | 0.1022 |         |         |    |                              |
| <i>A. naeslundii</i> JCM 8349                     | 0.7800 | 0.6940 | 0.8000 | 0.9160 |        | 0.7975 | 0.0914 | 0.0001  | 62.1513 | 3  | 0.0060                       |

### Percentage of biofilm degradation

|                                                       | A.a Y4 |       |       |       |      |
|-------------------------------------------------------|--------|-------|-------|-------|------|
|                                                       | n1     | n2    | n3    | Ave   | SD   |
| <i>L. acidophilus</i> JCM 1021                        | 90.09  | 89.20 | 91.19 | 90.16 | 1.00 |
| <i>L. casei</i> subsp. <i>rhamnosus</i> NBRC 3831     | 93.56  | 88.82 | 89.24 | 90.54 | 2.63 |
| <i>L. delbrueckii</i> subsp. <i>casei</i> JCM 1012    | 93.34  | 91.84 | 91.66 | 92.28 | 0.92 |
| <i>L. fermentum</i> JCM 1137                          | 92.44  | 93.75 | 93.52 | 93.24 | 0.70 |
| <i>L. lactis</i> NBRC 12007                           | 75.23  | 75.78 | 68.30 | 73.10 | 4.17 |
| <i>L. fermentum</i> NBRC 15885                        | 91.87  | 92.72 | 92.58 | 92.39 | 0.46 |
| <i>L. casei</i> NBRC 15883                            | 89.26  | 90.22 | 90.42 | 89.97 | 0.62 |
| <i>L. fructosum</i> NBRC 3516                         | 91.42  | 89.77 | 89.55 | 90.24 | 1.02 |
| <i>L. plantarum</i> NBRC 15891                        | 61.37  | 55.07 | 66.57 | 61.00 | 5.76 |
| <i>Leuconostoc mesenteroides</i> IAM 1046             | 85.34  | 86.32 | 87.58 | 86.41 | 1.12 |
| <i>L. johnsonii</i> NBRC 13952                        | 91.03  | 90.19 | 89.60 | 90.28 | 0.72 |
| <i>L. sake</i> NBRC 3541                              | 89.94  | 87.21 | 80.93 | 86.02 | 4.62 |
| <i>L. paracasei</i> subsp. <i>paracasei</i> NBRC 3533 | 86.00  | 82.57 | 82.37 | 83.65 | 2.04 |

| Percentage of degradation      | SUNY 75 |       |       |       |       |         |       |
|--------------------------------|---------|-------|-------|-------|-------|---------|-------|
|                                | n1      | n2    | n3    | n4    | n5    | Average | SD    |
| <i>L. fermentum</i> JCM 1137   | 44.80   | 63.41 | 69.98 | 65.42 | 84.15 | 65.55   | 12.66 |
| <i>L. acidophilus</i> JCM 1021 | 54.38   | 53.50 | 57.03 | 55.56 | 47.32 | 53.56   | 3.34  |
| <i>L. fermentum</i> NBRC 15885 | 42.08   | 68.72 | 77.60 | 69.74 | 69.30 | 65.49   | 12.15 |
| <i>L. fructosum</i> NBRC 3516  | 62.44   | 65.64 | 78.75 | 73.78 | 44.98 | 65.12   | 11.61 |

|                                     |                |        |        |        |        |        |       |
|-------------------------------------|----------------|--------|--------|--------|--------|--------|-------|
| L. plantarum NBRC 15891             | 20.25          | 26.13  | 31.14  | 36.43  | 36.14  | 30.02  | 6.17  |
| L. casei subsp. rhamnosus NBRC 3831 | -23.60         | -26.55 | -28.90 | -30.37 | -38.32 | -29.55 | 4.95  |
| L. johnsonii NBRC 13952             | 40.53          | 66.59  | 72.25  | 62.64  | 59.94  | 60.39  | 10.76 |
|                                     |                |        |        |        |        |        |       |
|                                     | <b>OMZ 534</b> |        |        |        |        |        |       |
| Percentage of degradation           | n1             | n2     | n3     | n4     | n5     | Ave    | SD    |
|                                     |                |        |        |        |        |        |       |
| L. fermentum JCM 1137               | 98.75          | 97.52  | 96.92  | 96.39  | 97.98  | 97.51  | 0.92  |
| L.. acidophilus JCM 1021            | 60.13          | 41.18  | 57.74  | 48.24  | 47.76  | 51.01  | 7.80  |
| L. fermentum NBRC 15885             | 99.86          | 99.57  | 99.29  | 99.71  | 99.44  | 99.58  | 0.22  |
| L. fructosum NBRC 3516              | 99.01          | 98.64  | 96.28  | 97.09  | 95.52  | 97.31  | 1.50  |
| L. plantarum NBRC 15891             | 43.16          | 44.49  | 54.66  | 45.36  | 53.75  | 48.28  | 5.47  |
| L. casei subsp. rhamnosus NBRC 3831 | 27.80          | 14.92  | 21.01  | 18.98  | 38.11  | 24.16  | 9.08  |
| L. johnsonii NBRC 13952             | 95.87          | 92.71  | 95.09  | 91.55  | 95.05  | 94.06  | 1.84  |

#### Comparisons of cell addition and supernatant addition on Y4 biofilm

| Biofilm values Y4                     | Cells addition |        |        |        |        | vs | Supernatant addition |        |        |        |        |
|---------------------------------------|----------------|--------|--------|--------|--------|----|----------------------|--------|--------|--------|--------|
|                                       | n1             | n2     | n3     | Ave    | SD     |    | n1                   | n2     | n3     | Ave    | SD     |
| L. johnsonii NBRC 13952               | 0.0427         | 0.0467 | 0.0495 | 0.0463 | 0.0034 |    | 0.1940               | 0.1768 | 0.1648 | 0.1785 | 0.0147 |
| L. acidophilus JCM 1021               | 0.0472         | 0.0514 | 0.0419 | 0.0468 | 0.0047 |    | 0.3024               | 0.2868 | 0.2566 | 0.2820 | 0.0233 |
| L. fructosum NBRC 3516                | 0.0409         | 0.0487 | 0.0498 | 0.0464 | 0.0049 |    | 0.1642               | 0.1535 | 0.1608 | 0.1595 | 0.0055 |
| L. casei subsp. rhamnosus NBRC 3831   | 0.0306         | 0.0532 | 0.0512 | 0.0450 | 0.0125 |    | 0.1690               | 0.1393 | 0.1584 | 0.1555 | 0.0150 |
| L. fermentum NBRC 15885               | 0.0387         | 0.0347 | 0.0353 | 0.0362 | 0.0022 |    | 0.1642               | 0.1535 | 0.1608 | 0.1595 | 0.0055 |
| A. actinomycetemcomitans Y4 (control) | 0.5198         | 0.5461 | 0.3622 | 0.4760 | 0.0994 |    |                      |        |        |        |        |

| Percentage of Degradation          | Cell addition |       |       |       |      | Vs | Supernatant addition |       |       |       |      |
|------------------------------------|---------------|-------|-------|-------|------|----|----------------------|-------|-------|-------|------|
|                                    | n1            | n2    | n3    | Ave   | SD   |    | n1                   | n2    | n3    | Ave   | SD   |
| L. johnsonii NBRC 13952            | 91.03         | 90.19 | 89.60 | 90.28 | 0.72 |    | 59.24                | 62.86 | 65.38 | 62.49 | 3.09 |
| L. acidophilus JCM 1021            | 90.09         | 89.20 | 91.19 | 90.16 | 1.00 |    | 36.46                | 39.74 | 46.08 | 40.76 | 4.89 |
| L. fructosum NBRC 3516             | 91.42         | 89.77 | 89.55 | 90.24 | 1.02 |    | 65.51                | 67.75 | 66.22 | 66.49 | 1.15 |
| L. casei subsp. rhamnosus NBRC3831 | 93.56         | 88.82 | 89.24 | 90.54 | 2.63 |    | 64.50                | 70.74 | 66.73 | 67.32 | 3.16 |
| L. fermentum NBRC 15885            | 91.87         | 92.72 | 92.58 | 92.39 | 0.46 |    | 65.51                | 67.75 | 66.22 | 66.49 | 1.15 |

**Comparison of nutrient rich medium and co-aggregation buffer condition**

|                                       | Nutrient rich Medium |        |        |        |        | Percentage of Degradation |       |       |       |      | Co-aggregation buffer condition |        |        |        |        |        | Percentage of Degradation |       |       |       |       |      |  |
|---------------------------------------|----------------------|--------|--------|--------|--------|---------------------------|-------|-------|-------|------|---------------------------------|--------|--------|--------|--------|--------|---------------------------|-------|-------|-------|-------|------|--|
|                                       | n1                   | n2     | n3     | Ave    | SD     | n1                        | n2    | n3    | Ave   | SD   | n1                              | n2     | n3     | n4     | Ave    | SD     | n1                        | n2    | n3    | n4    |       |      |  |
| L. johnsonii NBRC 13952               | 0.0427               | 0.0467 | 0.0495 | 0.0463 | 0.0034 | 91.03                     | 90.19 | 89.60 | 90.28 | 0.72 | 0.0636                          | 0.0664 | 0.0733 | 0.0744 | 0.0694 | 0.0052 | 94.09                     | 93.83 | 93.19 | 93.08 | 93.55 | 0.49 |  |
| L. acidophilus JCM 1021               | 0.0472               | 0.0514 | 0.0419 | 0.0468 | 0.0047 | 90.09                     | 89.20 | 91.19 | 90.16 | 1.00 | 0.1431                          | 0.1438 | 0.1390 | 0.1265 | 0.1381 | 0.0080 | 86.70                     | 86.63 | 87.08 | 88.24 | 87.16 | 0.74 |  |
| L. fructosum NBRC 3516                | 0.0409               | 0.0487 | 0.0498 | 0.0464 | 0.0049 | 91.42                     | 89.77 | 89.55 | 90.24 | 1.02 | 0.1564                          | 0.2734 | 0.1379 | 0.1687 | 0.1841 | 0.0609 | 85.46                     | 74.59 | 87.18 | 84.32 | 82.89 | 5.66 |  |
| L. casei subsp. rhamnosus NBRC 3831   | 0.0306               | 0.0532 | 0.0512 | 0.0450 | 0.0125 | 93.57                     | 88.82 | 89.24 | 90.54 | 2.63 | 0.0794                          | 0.0931 | 0.0832 | 0.0847 | 0.0851 | 0.0058 | 92.63                     | 91.34 | 92.27 | 92.13 | 92.09 | 0.54 |  |
| L. fermentum NBRC 15885               | 0.0387               | 0.0347 | 0.0353 | 0.0362 | 0.0022 | 91.87                     | 92.72 | 92.58 | 92.39 | 0.46 | 0.0402                          | 0.0599 | 0.0504 | 0.0391 | 0.0474 | 0.0098 | 96.26                     | 94.43 | 95.32 | 96.36 | 95.59 | 0.91 |  |
| L. plantarum NBRC 15891               | 0.1839               | 0.2138 | 0.1591 | 0.1856 | 0.0274 | 61.37                     | 55.08 | 66.57 | 61.01 | 5.75 | 0.0890                          | 0.0799 | 0.0867 | 0.0902 | 0.0864 | 0.0046 | 91.73                     | 92.58 | 91.94 | 91.62 | 91.97 | 0.43 |  |
| A. actinomycetemcomitans Y4 (control) | 0.5198               | 0.5461 | 0.3622 | 0.4760 | 0.0994 |                           |       |       |       |      | 1.0932                          | 0.9817 | 0.9717 | 0.9817 | 1.0071 | 0.0576 |                           |       |       |       |       |      |  |

| Autoclaved cells                    | n1    | n2    | n3    | n4    | n5    | n1         | n2         | n3         | n4         | n5        |          |
|-------------------------------------|-------|-------|-------|-------|-------|------------|------------|------------|------------|-----------|----------|
| L. johnsonii NBRC 13952             | 0.278 | 0.218 | 0.199 | 0.157 | 0.266 | -110.28744 | -64.901664 | -50.529501 | -18.759455 | -101.2103 | -92.1331 |
| L. acidophilus JCM 1021             | 0.106 | 0.215 | 0.28  | 0.148 | 0.211 | -113.31316 | -125.41604 | -100.45386 | -18.759455 | -112.7458 | -117.158 |
| L. fructosum NBRC 3516              | 0.115 | 0.139 | 0.123 | 0.147 | 0.16  | -24.054463 | -42.208775 | -40.695915 | -31.618759 | -28.59304 | -31.6188 |
| L. casei subsp. rhamnosus NBRC 3831 | 0.108 | 0.162 | 0.121 | 0.137 | 0.121 | 18.305598  | -22.541604 | 8.4720121  | -3.6308623 | 8.472012  | 1.412002 |
| L. fermentum NBRC 15885             | 0.064 | 0.066 | 0.055 | 0.061 | 0.078 | 51.588502  | 50.075643  | 58.396369  | 53.857791  | 40.99849  | 47.55421 |
| A. actinomycetemcomitans Y4         | 0.114 | 0.103 | 0.117 | 0.116 | 0.085 |            |            |            |            |           |          |

**For CFU, Samples were collected from the supernatant of a biofilm**

| Bacteria                             | CFU/ml    |          |          | Log CFU/ml |           |            | Ave      | SD       | Biofilm value |       |       |       |          |          |
|--------------------------------------|-----------|----------|----------|------------|-----------|------------|----------|----------|---------------|-------|-------|-------|----------|----------|
|                                      | n1        | n2       | n3       | n1         | n2        | n3         |          |          | n1            | n2    | n3    | n4    | Ave      | SD       |
| A.a biofilm control                  | 480       | 800      | 1000     | 2.6812412  | 2.90309   | 3          | 2.861444 | 0.163409 | 1.093         | 0.982 | 0.972 | 0.982 | 1.007058 | 0.057598 |
| A.a + L. fermentum NBRC 15885        | 492000    | 602000   | 6000000  | 5.6919651  | 5.7795965 | 6.77815125 | 6.083238 | 0.603406 | 0.040         | 0.060 | 0.050 | 0.039 | 0.04742  | 0.009758 |
| A.a + L. casei subsp. rhamnosus 3831 | 28000     | 100000   | 60000    | 4.447158   | 5         | 4.77815125 | 4.74177  | 0.278211 | 0.079         | 0.093 | 0.083 | 0.085 | 0.085089 | 0.005812 |
| A.a+ L. fructosum NBRC 3516          | 18000     | 62000    | 25000    | 4.2552725  | 4.7923917 | 4.39794001 | 4.481868 | 0.278221 | 0.156         | 0.273 | 0.138 | 0.169 | 0.18412  | 0.060851 |
| A.a+ L. acidophilus JCM 1021         | 6000      | 60000    | 60000    | 3.7781513  | 4.7781513 | 4.77815125 | 4.444818 | 0.57735  | 0.143         | 0.144 | 0.139 | 0.127 | 0.138119 | 0.008012 |
| A.a + L. johnsonii NBRC 13952        | 260000000 | 68000000 | 60000000 | 8.4149733  | 7.8325089 | 7.77815125 | 8.008545 | 0.353025 | 0.064         | 0.066 | 0.073 | 0.074 | 0.069433 | 0.005236 |

**Comparison of adjusted and non-adjusted pH of probiotic supernatant on biofilm degradation**

| Biofilm values |        |        | Bacteria                            | Condition | Biofilm values |        | Percentage of Degradation |       |       |         |      | Paired T-test |   |    |                              |
|----------------|--------|--------|-------------------------------------|-----------|----------------|--------|---------------------------|-------|-------|---------|------|---------------|---|----|------------------------------|
| n1             | n2     | n3     |                                     |           | Ave            | SD     | n1                        | n2    | n3    | Average | SD   | P value       | t | df | standard error of difference |
| 0.5198         | 0.5461 | 0.3622 | A. actinomycetemcomitans Y4 control |           | 0.4760         | 0.0994 |                           |       |       |         |      |               |   |    |                              |
| 0.1940         | 0.1768 | 0.1648 | L. johnsonii NBRC 13952             | untreated | 0.1785         | 0.0147 | 59.24                     | 62.86 | 65.38 | 62.49   | 3.09 |               |   |    |                              |

|            |            |            |                                        |           |            |            |       |       |       |       |      |      |      |          |       |
|------------|------------|------------|----------------------------------------|-----------|------------|------------|-------|-------|-------|-------|------|------|------|----------|-------|
| 0.175<br>9 | 0.162<br>7 | 0.136<br>9 |                                        | pH 6.5    | 0.158<br>5 | 0.019<br>8 | 63.05 | 65.82 | 71.23 | 66.70 | 4.16 | 0.04 | 4.65 | 2.0<br>0 | 0.88  |
| 0.302<br>4 | 0.286<br>8 | 0.256<br>6 | L. acidophilus JCM<br>1021             | untreated | 0.282<br>0 | 0.023<br>3 | 36.46 | 39.74 | 46.08 | 40.76 | 4.89 |      |      |          |       |
| 0.202<br>1 | 0.228<br>6 | 0.364<br>9 |                                        | pH 6.5    | 0.265<br>2 | 0.087<br>3 | 57.55 | 51.98 | 23.35 | 54.76 | 3.94 | 0.82 | 0.26 | 2        | 13.38 |
| 0.164<br>2 | 0.153<br>5 | 0.160<br>8 | L. fructosum NBRC<br>3516              | untreated | 0.159<br>5 | 0.005<br>5 | 65.51 | 67.75 | 66.22 | 66.49 | 1.15 |      |      |          |       |
| 0.149<br>5 | 0.128<br>6 | 0.149<br>8 |                                        | pH 6.5    | 0.142<br>6 | 0.012<br>1 | 68.59 | 72.98 | 68.53 | 70.03 | 2.55 | 0.06 | 4.05 | 2        | 0.87  |
| 0.139<br>8 | 0.160<br>6 | 0.229<br>7 | L. casei subsp.<br>rhamnosus NBRC 3831 | untreated | 0.176<br>7 | 0.047<br>1 | 70.63 | 66.27 | 51.75 | 68.45 | 3.08 |      |      |          |       |
| 0.208<br>7 | 0.199<br>3 | 0.305<br>5 |                                        | pH 6.5    | 0.237<br>8 | 0.058<br>8 | 56.16 | 58.14 | 35.83 | 57.15 | 1.40 | 0.03 | 5.37 | 2        | 2.39  |
| 0.169<br>0 | 0.139<br>3 | 0.158<br>4 | L. fermentum NBRC<br>15885             | untreated | 0.155<br>5 | 0.015<br>0 | 64.50 | 70.74 | 66.73 | 67.32 | 3.16 |      |      |          |       |
| 0.211<br>5 | 0.252<br>0 | 0.198<br>2 |                                        | pH 6.5    | 0.220<br>6 | 0.028<br>0 | 55.56 | 47.07 | 58.37 | 53.67 | 5.89 | 0.11 | 2.73 | 2        | 5.01  |

### Biofilm degradation of by lactic acid influence

| Biofilm values |        |        |                      | Biofilm values |          |
|----------------|--------|--------|----------------------|----------------|----------|
| n1             | n2     | n3     |                      | Average        | SD       |
| 0.3270         | 0.3217 | 0.2804 | 250 mM (lactic acid) | 0.30971        | 0.025533 |
| 0.3656         | 0.3140 | 0.3733 | 200 mM (lactic acid) | 0.35098        | 0.032242 |
| 0.3173         | 0.2987 | 0.3951 | 150 mM (lactic acid) | 0.33700        | 0.051133 |
| 0.3131         | 0.3805 | 0.3605 | 100 mM (lactic acid) | 0.34680        | 0.04761  |

| Comparison between lactic acid addition with cells addition |         |    |                              |
|-------------------------------------------------------------|---------|----|------------------------------|
| T-test                                                      |         |    |                              |
| P value                                                     | t       | df | standard error of difference |
| 0.0001                                                      | 24.3252 | 7  | 0.011                        |
|                                                             |         |    |                              |

### Biofilm degradation by probiotics bacteria

| Probiotic strains       | n1     | n2     | n3     | n4     | n5     | n6     | Ave    | SD       |
|-------------------------|--------|--------|--------|--------|--------|--------|--------|----------|
| L. sake NBRC 3541       | 0.0479 | 0.0609 | 0.0908 | 0.0848 | 0.0797 | 0.0911 | 0.0759 | 0.017868 |
| L. fermentum NBRC 15885 | 0.0387 | 0.0347 | 0.0353 | 0.0342 | 0.0393 | 0.0511 | 0.0389 | 0.002384 |
| L. acidophilus JCM 1021 | 0.0472 | 0.0514 | 0.0419 |        |        |        | 0.0468 | 0.004742 |
| L. casei NBRC 15883     | 0.0511 | 0.0466 | 0.0456 | 0.0863 | 0.0751 | 0.0832 | 0.0647 | 0.018607 |
| L. johnsonii NBRC 13952 | 0.0427 | 0.0467 | 0.0495 | 0.0699 | 0.0664 | 0.1423 | 0.0696 | 0.012297 |

**Effect of enzymes on biofilm degradation (in co-aggregation buffer)**

| <b>Enzyme degradation activity</b>               |           |           |           |           |            |           | <b>% Degradation</b> |
|--------------------------------------------------|-----------|-----------|-----------|-----------|------------|-----------|----------------------|
|                                                  | <b>n1</b> | <b>n2</b> | <b>n3</b> | <b>n4</b> | <b>Ave</b> | <b>SD</b> | <b>%</b>             |
| A. actinomycetemcomitans Y4 control (serotype b) | 1.0932    | 0.9807    | 0.9717    | 0.9817    | 1.0068     | 0.0577    |                      |
| Proteinase K                                     | 0.5147    | 0.7068    | 0.5000    | 0.6336    | 0.5888     | 0.0733    | 41.52114             |
| Lipase                                           | 0.1346    | 0.0943    | 0.1018    | 0.0903    | 0.0955     | 0.0058    | 90.51587             |
| Amylase                                          | 0.4776    | 0.4662    | 0.4565    | 1.4865    | 0.4668     | 0.0106    | 53.63862             |
| combine                                          | 0.0541    | 0.0615    | 0.1118    | 0.0775    | 0.0762     | 0.0257    | 92.43113             |
|                                                  |           |           |           |           |            |           |                      |
| A. actinomycetemcomitans SUNY 75 (serotype a)    | 1.7195    | 1.6988    | 1.6543    | 1.3474    | 1.6050     | 0.1739    |                      |
| Proteinase K                                     | 0.7869    | 0.7429    | 0.7231    | 0.7581    | 0.7527     | 0.0269    | 53.1015              |
| Lipase                                           | 1.1765    | 1.0390    | 1.0267    | 1.0000    | 1.0605     | 0.0790    | 33.9237              |
| Amylase                                          | 1.3684    | 1.2530    | 1.2500    | 1.3659    | 1.3093     | 0.0668    | 18.42232             |
| combine                                          | 0.9219    | 0.7059    | 0.7761    | 0.7361    | 0.7850     | 0.0957    | 51.09053             |
|                                                  |           |           |           |           |            |           |                      |
| A. actinomycetemcomitans OMZ534 (serotype e)     | 0.6052    | 0.4060    | 0.4007    | 0.4382    | 0.4625     | 0.0965    |                      |
| Proteinase K                                     | 0.1579    | 0.1786    | 0.1579    | 0.1429    | 0.1593     | 0.0147    | 65.55578             |
| Lipase                                           | 0.1905    | 0.1051    | 0.1252    | 0.1654    | 0.1465     | 0.0386    | 68.31675             |
| Amylase                                          | 0.2708    | 0.1962    | 0.2345    | 0.1867    | 0.2220     | 0.0385    | 51.98998             |
| combine                                          | 0.0702    | 0.1379    | 0.0833    | 0.0172    | 0.0772     | 0.0496    | 83.31453             |

| <b>Lipase Activity Profile from supernatant</b>       | Absorbance |       |       | BALB   |        |        | IU/L   |       |        |        |       |
|-------------------------------------------------------|------------|-------|-------|--------|--------|--------|--------|-------|--------|--------|-------|
|                                                       | n1         | n2    | n3    | n1     | n2     | n3     | n1     | n2    | n3     | Ave    | SD    |
| Positive control                                      | 0.030      | 0.028 | 0.031 | 30.000 | 28.000 | 31.000 | 4.410  | 4.116 | 4.557  | 4.361  | 0.225 |
| L. fermentum NBRC 15885                               | 0.037      | 0.036 | 0.031 | 37.000 | 36.000 | 31.000 | 5.439  | 5.292 | 4.557  | 5.096  | 0.473 |
| L. casei subsp. rhamnosus NBRC 3831                   | 0.069      | 0.064 | 0.065 | 69.000 | 64.000 | 65.000 | 10.143 | 9.408 | 9.555  | 9.702  | 0.389 |
| L. fructosum NBRC 3516                                | 0.037      | 0.030 | 0.034 | 37.000 | 30.000 | 34.000 | 5.439  | 4.410 | 4.998  | 4.949  | 0.516 |
| L. acidophilus JCM 1021                               | 0.042      | 0.064 | 0.080 | 42.000 | 64.000 | 80.000 | 6.174  | 9.408 | 11.760 | 10.584 | 1.663 |
| L. johnsonii NBRC 13952                               | 0.069      | 0.068 | 0.081 | 69.000 | 68.000 | 81.000 | 10.143 | 9.996 | 11.907 | 10.682 | 1.063 |
| A. naeslundii JCM 8349                                | 0.057      | 0.064 | 0.054 | 56.667 | 64.333 | 54.000 | 8.33   | 9.457 | 7.938  | 8.575  | 0.789 |
| negative control                                      | 0.008      | 0.005 | 0.009 | 8.000  | 5.000  | 9.000  | 1.176  | 0.735 | 1.323  | 1.078  | 0.306 |
| *0.001 Abs=1BALB<br>IU/L=BALBx0.147 (from kit manual) |            |       |       |        |        |        |        |       |        |        |       |

| <b>Influence of Lipase inhibitor on biofilm degradation activity</b> |                                                 |       |       |       |       |       |       |                                                 |         |    |                              |
|----------------------------------------------------------------------|-------------------------------------------------|-------|-------|-------|-------|-------|-------|-------------------------------------------------|---------|----|------------------------------|
|                                                                      | <b>A. actinomycetemcomitans Y4 (serotype b)</b> |       |       |       |       |       |       | Paired T-test with and without Lipase inhibitor |         |    |                              |
|                                                                      | n1                                              | n2    | n3    | n4    | n5    | Ave   | SD    | P value                                         | t       | df | standard error of difference |
| L. fermentum NBRC 15885 supernatnat +Li                              | 0.085                                           | 0.079 | 0.058 | 0.055 | 0.118 | 0.079 | 0.025 | 0.0105                                          | 9.6916  | 2  | 0.009                        |
| L. fermentum NBRC 15885 supernatant                                  | 0.164                                           | 0.154 | 0.161 |       |       | 0.159 | 0.005 |                                                 |         |    |                              |
| L. casei subsp. rhamnosus NBRC 3831 supernatnat +Li                  | 0.864                                           | 1.519 | 1.497 | 1.594 | 1.926 | 1.480 | 0.385 | 0.0359                                          | 5.1333  | 2  | 0.222                        |
| L. casei subsp. rhamnosus NBRC 3831 supernatant                      | 0.169                                           | 0.139 | 0.158 |       |       | 0.156 | 0.015 |                                                 |         |    |                              |
| L. fructosum NBRC 3516 supernatnat +Li                               | 0.057                                           | 0.113 | 0.098 | 0.092 | 0.040 | 0.080 | 0.031 | 0.0716                                          | 3.5347  | 2  | 0.02                         |
| L. fructosum NBRC 3516 supernatnat                                   | 0.164                                           | 0.154 | 0.161 |       |       | 0.159 | 0.005 |                                                 |         |    |                              |
| L. acidophilus JCM 1021 supernatnat +Li                              | 1.565                                           | 1.721 | 2.032 | 1.992 | 2.041 | 1.870 | 0.215 | 0.001                                           | 9.9052  | 2  | 0.15                         |
| L. acidophilus JCM 1021 supernatnat                                  | 0.302                                           | 0.287 | 0.257 |       |       | 0.282 | 0.023 |                                                 |         |    |                              |
| L. johnsonii NBRC 13952 supernatnat +Li                              | 0.426                                           | 0.391 | 0.551 | 0.563 |       | 0.483 | 0.087 | 0.0366                                          | 5.0811  | 2  | 0.055                        |
| L. johnsonii NBRC 13952 supernatnat                                  | 0.194                                           | 0.177 | 0.165 |       |       | 0.179 | 0.015 |                                                 |         |    |                              |
| L. plantarum NBRC 15891 supernatnat +Li                              | 2.293                                           | 2.088 | 2.000 | 2.053 |       | 2.109 | 0.128 | 0.0018                                          | 23.7927 | 2  | 0.089                        |
| L. plantarum NBRC 15891 supernatnat                                  | 0.018                                           | 0.015 | 0.026 |       |       | 0.020 | 0.006 |                                                 |         |    |                              |
| A. naeslundii JCM 8349 supernatant +Li                               | 0.667                                           | 0.909 | 0.520 | 0.382 |       | 0.619 | 0.225 | 0.3105                                          | 1.2172  | 3  | 0.02                         |
| A. naeslundii JCM 8349 supernatant                                   | 0.581                                           | 0.676 | 0.615 | 0.550 |       | 0.605 | 0.005 |                                                 |         |    |                              |
| A.a control                                                          | 0.520                                           | 0.546 | 0.362 | 0.457 | 0.376 | 0.452 | 0.083 |                                                 |         |    |                              |



| <b>Influence of Lipase inhibitor on biofilm degradation activity</b> |                                                      |        |        |        |        |        |        |                                                            |        |    |                              |
|----------------------------------------------------------------------|------------------------------------------------------|--------|--------|--------|--------|--------|--------|------------------------------------------------------------|--------|----|------------------------------|
|                                                                      | <b>A. actinomycetemcomitans SUNY 75 (serotype a)</b> |        |        |        |        |        |        | Paired t-test comparison with and without lipase inhibitor |        |    |                              |
|                                                                      | n1                                                   | n2     | n3     | n4     | n5     | Ave    | SD     | P value                                                    | t      | df | standard error of difference |
| L. fermentum NBRC 15885 supernatnat +Li                              | 0.1200                                               | 0.1190 | 0.1130 | 0.1290 | 0.1110 | 0.1184 | 0.0071 | 0.9284                                                     | 0.0976 | 3  | 0.003                        |
| L. fermentum NBRC 15885 supernatant                                  | 0.1150                                               | 0.1170 | 0.1200 | 0.1280 |        | 0.1200 | 0.0057 |                                                            |        |    |                              |
| L. casei subsp. rhamnosus NBRC 3831 supernatnat +Li                  | 0.3600                                               | 0.3260 | 0.3720 | 0.3670 |        | 0.3563 | 0.0208 | 0.01                                                       | 9.9348 | 2  | 0.012                        |
| L. casei subsp. rhamnosus NBRC 3831 supernatant                      | 0.2360                                               | 0.2320 | 0.2410 |        |        | 0.2363 | 0.0045 |                                                            |        |    |                              |
| L. fructosum NBRC 3516 supernatant +Li                               | 0.1028                                               | 0.1087 | 0.1055 | 0.0967 |        | 0.1034 | 0.0051 | 0.3537                                                     | 1.0946 | 3  | 0.009                        |
| L. fructosum NBRC 3516 supernatnat                                   | 0.1221                                               | 0.0960 | 0.1098 | 0.1256 |        | 0.1134 | 0.0134 |                                                            |        |    |                              |
| L. acidophilus JCM 1021 supernatnat +Li                              | 0.2520                                               | 0.2410 | 0.2630 | 0.2750 |        | 0.2578 | 0.0146 | 0.775                                                      | 0.3127 | 3  | 0.05                         |
| L. acidophilus JCM 1021 supernatnat                                  | 0.3690                                               | 0.3240 | 0.2070 | 0.1930 |        | 0.2733 | 0.0867 |                                                            |        |    |                              |
| L. johnsonii NBRC 13952 supernatnat +Li                              | 0.2140                                               | 0.2080 | 0.1920 | 0.2240 |        | 0.2095 | 0.0134 | 0.0104                                                     | 5.7624 | 3  | 0.006                        |
| L. johnsonii NBRC 13952 supernatnat                                  | 0.1780                                               | 0.1774 | 0.1700 | 0.1732 |        | 0.1747 | 0.0038 |                                                            |        |    |                              |
| L. plantarum NBRC 15891 supernatnat +Li                              | 0.4180                                               | 0.3760 | 0.3720 | 0.3720 |        | 0.3845 | 0.0224 | 0.3095                                                     | 1.2204 | 3  | 0.027                        |
| L. plantarum NBRC 15891 supernatnat                                  | 0.3750                                               | 0.3673 | 0.2680 | 0.3950 |        | 0.3513 | 0.0568 |                                                            |        |    |                              |
| A. naeslundii JCM 8349 supernatant +Li                               | 0.3890                                               | 0.2980 | 0.3460 | 0.2970 |        | 0.3325 | 0.0441 | 0.7537                                                     | 0.3437 | 3  | 0.023                        |
| A. naeslundii JCM 8349 supernatant                                   | 0.3400                                               | 0.3230 | 0.2990 | 0.3360 |        | 0.3245 | 0.0185 |                                                            |        |    |                              |
| A.actinomycetemcomitans SUNY 75 (control)                            | 0.2210                                               | 0.2210 | 0.2810 | 0.2040 |        | 0.2318 | 0.0338 |                                                            |        |    |                              |

| <b>Influence of Lipase inhibitor on biofilm degradation activity</b> |                                                  |        |        |        |          |          |          |               |         |    |                              |
|----------------------------------------------------------------------|--------------------------------------------------|--------|--------|--------|----------|----------|----------|---------------|---------|----|------------------------------|
|                                                                      | <b>A. actinomycetemcomitans OMZ (serotype e)</b> |        |        |        |          |          |          | Paired t-test |         |    |                              |
|                                                                      | n1                                               | n2     | n3     | n4     | n5       | Ave      | SD       | P value       | t       | df | standard error of difference |
| L. fermentum NBRC 15885 supernatnat +Li                              | 0.0487                                           | 0.0299 | 0.0549 | 0.0363 |          | 0.042428 | 0.011415 | 0.387         | 1.0097  | 3  | 0.008                        |
| L. fermentum NBRC 15885 supernatant                                  | 0.0270                                           | 0.0339 | 0.0314 | 0.0441 |          | 0.0341   | 0.00725  |               |         |    |                              |
| L. casei subsp. rhamnosus NBRC 3831 supernatnat +Li                  | 1.1317                                           | 0.9414 | 0.7417 | 1.4672 |          | 1.070488 | 0.308674 | 0.335         | 1.1457  | 3  | 0.219                        |
| L. casei subsp. rhamnosus NBRC 3831 supernatant                      | 0.6420                                           | 0.6609 | 1.3655 | 0.5203 |          | 0.797205 | 0.38395  |               |         |    |                              |
| L. fructosum NBRC 3516 supernatnat +Li                               | 0.0386                                           | 0.0379 | 0.0265 | 0.0203 |          | 0.030811 | 0.008915 | 0.3872        | 1.0091  | 3  | 0.007                        |
| L. fructosum NBRC 3516 supernatnat                                   | 0.0360                                           | 0.0660 | 0.0229 | 0.0281 |          | 0.038234 | 0.019271 |               |         |    |                              |
| L. acidophilus JCM 1021 supernatnat +Li                              | 2.9771                                           | 2.8061 | 3.0112 | 2.5196 |          | 2.828512 | 0.224633 | 0.0018        | 10.6443 | 3  | 0.164                        |
| L. acidophilus JCM 1021 supernatnat                                  | 0.8442                                           | 0.9183 | 1.5471 | 1.0415 |          | 1.087777 | 0.316837 |               |         |    |                              |
| L. johnsonii NBRC 13952 supernatnat +Li                              | 2.7150                                           | 3.1988 | 3.1389 | 4.1079 |          | 3.290158 | 0.586161 | 0.002         | 10.226  | 3  | 0.309                        |
| L. johnsonii NBRC 13952 supernatnat                                  | 0.1294                                           | 0.1415 | 0.1727 | 0.0710 |          | 0.128641 | 0.042517 |               |         |    |                              |
| L. plantarum NBRC 15891 supernatnat +Li                              | 0.3756                                           | 0.9327 | 0.3583 | 0.7378 |          | 0.601102 | 0.281937 | 0.4635        | 0.8381  | 3  | 0.139                        |
| L. plantarum NBRC 15891 supernatnat                                  | 0.4560                                           | 0.4448 | 0.4691 | 0.5693 |          | 0.484823 | 0.057219 |               |         |    |                              |
| A. naeslundii JCM 8349 supernatant +Li                               | 0.2550                                           | 0.3390 | 0.1780 | 0.2160 |          | 0.247    | 0.06892  | 0.8376        | 0.2234  | 3  | 0.04                         |
| A. naeslundii JCM 8349 supernatant                                   | 0.2490                                           | 0.2170 | 0.2420 | 0.2440 |          | 0.238    | 0.014306 |               |         |    |                              |
| A.actinomycetemcomitans OMZ534 control                               | 0.4029                                           | 0.3009 | 0.4019 | 0.5437 | 0.534286 | 0.436745 | 0.102168 |               |         |    |                              |

**Lactic acid concentration of culture supernatant of biofilm assay after probiotic strains addition**

| Day 4 biofilm supernatant          | Lactic acid |         |                  | Area {y} | x           | [Lactic acid] mM | Area {y} | x        | [Lactic acid] mM | Ave      | SD       |
|------------------------------------|-------------|---------|------------------|----------|-------------|------------------|----------|----------|------------------|----------|----------|
|                                    | Area {y}    | x       | [Lactic acid] mM |          |             |                  |          |          |                  |          |          |
| L. lactis 12007                    | 260721      | 14.1712 | 70.8558          | 272854   | 14.83063376 | 74.15316882      | 308541   | 16.77036 | 83.85177737      | 76.2869  | 6.755628 |
| L. jonhsonii 13952                 | *461351     | 25.0761 | 125.3807         | 501489   | 27.25779976 | 136.2889988      | 504782   | 27.43679 | 137.183933       | 132.9512 | 6.571479 |
| L. casei 3831                      | 731318      | 39.7499 | 198.7493         | 854121   | 46.42466572 | 232.1233286      | 812795   | 44.17844 | 220.8922165      | 217.2550 | 16.98171 |
| L. paracasei subsp. paracasei 3533 | 819712      | 44.5544 | 222.7720         | 874552   | 47.53516687 | 237.6758343      | 907542   | 49.3283  | 246.6414828      | 235.6965 | 12.0572  |
| Leuconostoc mesenteroides IAM 1046 | 912357      | 49.5900 | 247.9500         | 953325   | 51.81677356 | 259.0838678      | 947892   | 51.52147 | 257.6073486      | 254.8804 | 6.047113 |
| L. sake 3541                       | 642897      | 34.9439 | 174.7193         | 662871   | 36.02951408 | 180.1475704      | 605278   | 32.89912 | 164.4955973      | 173.1208 | 7.947475 |
| L. fermentum 15885                 | 489588      | 26.6109 | 133.0547         | 509742   | 27.70638113 | 138.5319056      | 512785   | 27.87178 | 139.3588977      | 136.9818 | 3.426054 |
| L. casei 15883                     | 671656      | 36.5070 | 182.5351         | 700248   | 38.0610936  | 190.305468       | 754125   | 40.98951 | 204.9475486      | 192.5960 | 11.38046 |
| L. plantarum 15891                 | 857849      | 46.6273 | 233.1365         | 871547   | 47.37183389 | 236.8591695      | 854172   | 46.42744 | 232.1371888      | 234.0443 | 2.488443 |
| Leuconostoc fructosum 3516         | 99303       | 5.3975  | 26.9874          | 100542   | 5.464833134 | 27.32416567      | 99311    | 5.397924 | 26.98961844      | 27.1004  | 0.193782 |

**Biofilm formation by probiotic strains in mono-culture compared to A.a Y4 in monoculture**

|                                | n1     | n2     | n3     | n4     | n5     | n6     | Average | SD     |
|--------------------------------|--------|--------|--------|--------|--------|--------|---------|--------|
| L. plantarum NBRC 15891        | 0.0031 | 0.0045 | 0.0022 | 0.0310 | 0.0112 | 0.0640 | 0.0193  | 0.0244 |
| L. johnsonii NBRC 13952        | 0.0112 | 0.0128 | 0.0541 | 0.0302 | 0.0389 | 0.0248 | 0.0287  | 0.0163 |
| L. fermentum NBRC 15885        | 0.0175 | 0.0099 | 0.0029 | 0.0035 | 0.0056 | 0.0058 | 0.0075  | 0.0055 |
| L. casei subsp. rhamnosus 3831 | 0.0258 | 0.0048 | 0.0192 | 0.0040 | 0.0202 | 0.0189 | 0.0155  | 0.0089 |
| L. fructosum NBRC 3516         | 0.0939 | 0.0377 | 0.0233 | 0.0197 | 0.0366 | 0.0344 | 0.0409  | 0.0270 |
| L. acidophilus JCM 1021        | 0.0121 | 0.0193 | 0.1592 | 0.0117 | 0.0652 | 0.0070 | 0.0457  | 0.0596 |
| A.a only                       | 0.3990 | 0.3331 | 0.3524 | 0.2749 | 0.3063 |        | 0.3331  | 0.0470 |
